# Supplementary material for: Water-induced spinodal decomposition of mixed halide perovskite captured by real-time liquid TEM imaging
Source: Royal Society of Chemistry journal article supplement (doi:10.1039/d4ee03381g), 2024-01-01
Supplement: d4ee03381g1.pdf [file d4ee03381g1.pdf]

## Supporting information

### **Water-induced Spinodal Decomposition of Mixed Halide Perovskite captured by Real-Time Liquid TEM Imaging**

Nicolas Folastre<sup>1,2</sup>, Mohammad Ali Akhavan Kazemi<sup>1</sup>, Kirill Cherednichneko<sup>1,2</sup>,  
Arash Jamali<sup>3</sup>, Jean Rousset<sup>4</sup>, Frédéric Sauvage<sup>1\*</sup> and Arnaud Demortière<sup>1,2</sup>

<sup>1</sup> Laboratoire de Réactivité et Chimie des Solides (LRCS), CNRS UMR 7314 - Institut de Chimie de Picardie FR 3085, Université de Picardie Jules Verne, 33 rue Saint Leu, FR-80039 Amiens Cedex, France.

<sup>2</sup> Réseau sur le stockage électrochimique de l'énergie (RS2E), CNRS FR3459 - 15 rue Baudelocque 80039 Amiens Cedex, France.

<sup>3</sup> Plateforme de Microscopie Electronique, Université de Picardie Jules Verne, Hub de l'Energie, Rue Baudelocque, 80039 Amiens Cedex, France.

<sup>4</sup> EDF R&D, EDF Lab Paris-Saclay, Department SYSTEME, Palaiseau, 91120 France ; IPVF, Institut Photovoltaïque d'Ile-de-France, Palaiseau, 91120 France.

Corresponding Author: [frederic.sauvage@u-picardie.fr](mailto:frederic.sauvage@u-picardie.fr)

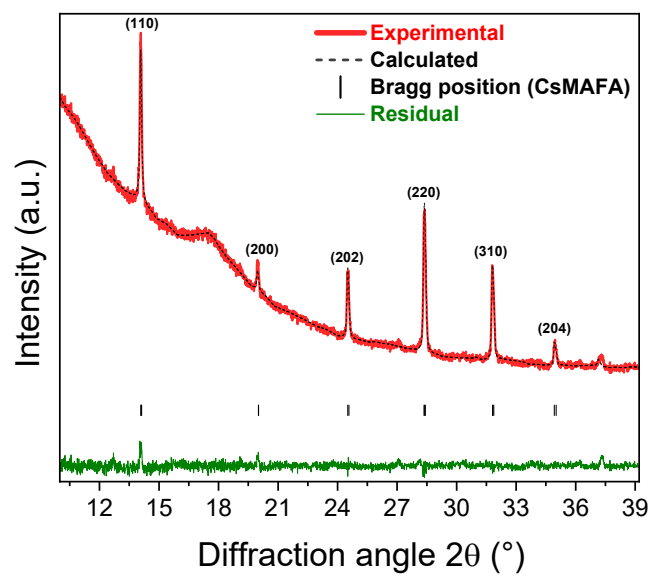

**Figure S1** X-Ray diffraction pattern of CsMAFA film obtained following the procedure reported in the experimental part. Structural refinement of the lattice cell parameter by full pattern matching using Fullprof is reported including all Bragg reflections. The broad background contribution at ca.  $17^\circ$  and the diffraction peak at ca.  $37^\circ$  are corresponding to the substrate.

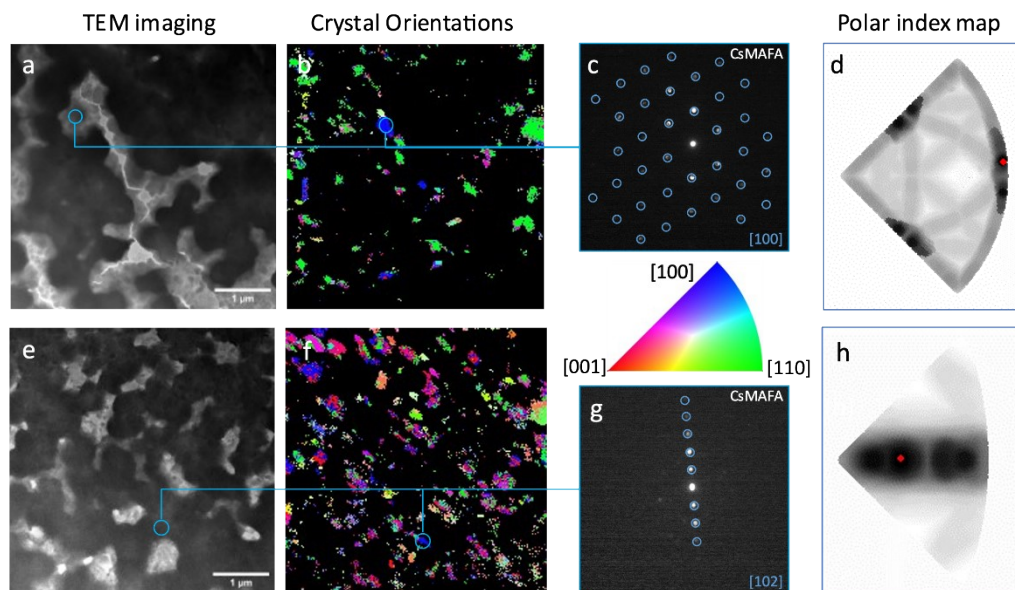

**Figure S2** (a,e) TEM imaging and (b,f) 4D-STEM-ASTAR grain orientation maps of two different areas of pristine CsMAFA. Two diffraction patterns (c,g) captured from the 4D-STEM scans show the typical noise due to the thickness of the pristine sample. The triangle color code indicates the corresponding crystal directions. The darkest part of the polar index maps (d,h) shows the most probable crystalline orientations, and the red dot indicates the most probable one.
